# Supplementary material for: Cathode-supported solid polymer electrolyte with solvate ionic liquid and polysulfide modification for rechargeable lithium metal batteries
Source: Royal Society of Chemistry journal article supplement (doi:10.1039/d4se01381f), 2025-01-01
Supplement: d4se01381f1.pdf [file d4se01381f1.pdf]

## Supplementary Materials for

### **Cathode-supported solid polymer electrolyte with solvate ionic liquid and polysulfide modification towards rechargeable lithium metal batteries**

Yan Yuan<sup>1\*</sup>, Yaxin Kong<sup>1</sup>, Xiuping Peng<sup>1</sup>, Lei Zhang<sup>2</sup>, Zeyu Li<sup>1</sup>, Hai Lu<sup>2\*</sup>

<sup>1</sup>School of Metallurgical Engineering, Xi'an University of Architecture and  
Technology, Xi'an 710055, China

<sup>2</sup>School of Materials Science and Engineering, Xi'an University of Science and  
Technology, Xi'an 710054, China

---

\* Corresponding author 1#: Tel.: +86 29 82202923  
E-mail address: lingyi21@126.com

\* Corresponding author 2#: Tel.: +86 29 85587373  
E-mail address: lhxust@126.com

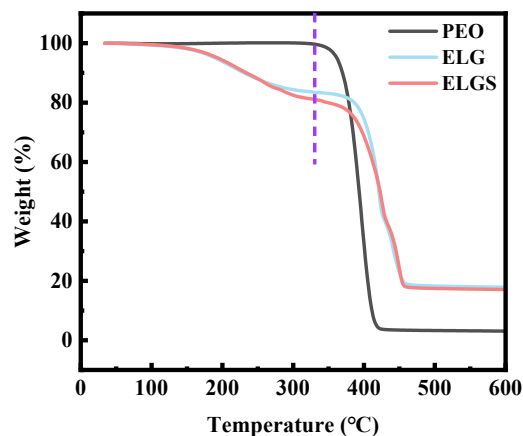

Fig.S1 TGA results of the PEO and as-prepared SPEs for identifying the residual solvents

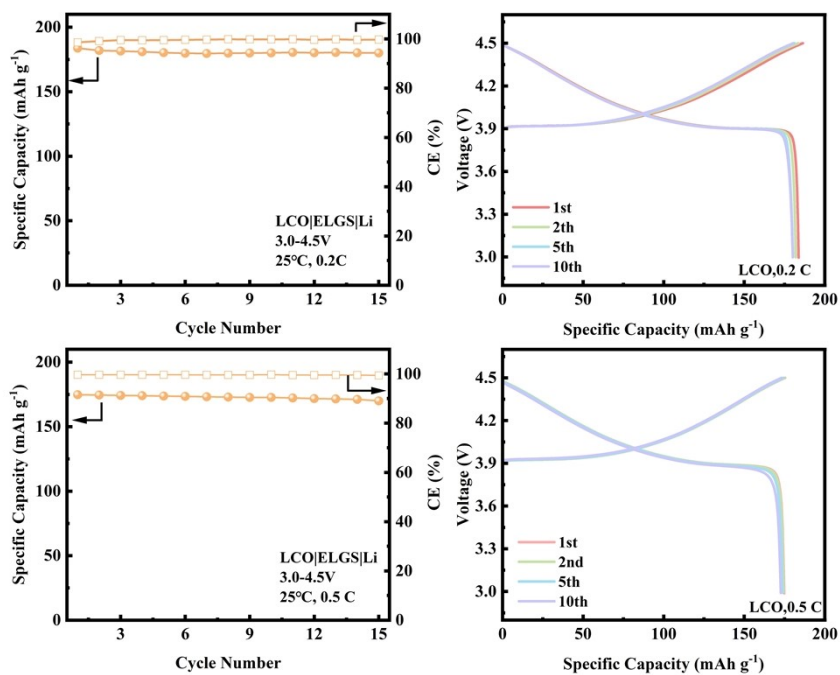

Fig.S2 Cycle performance and corresponding charge/discharge profiles of the LCO|ELGS-1|Li cell

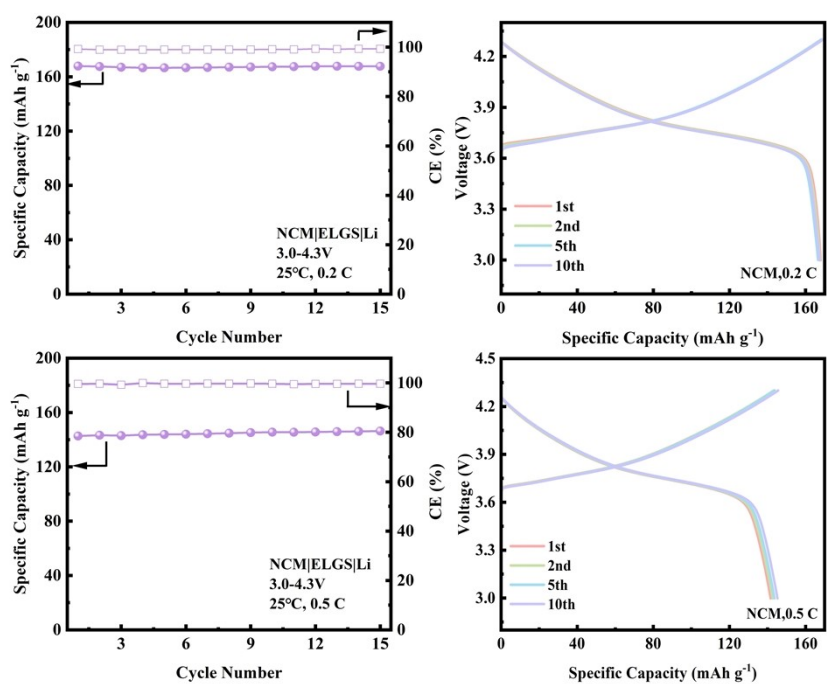

Fig.S3 Cycle performance and corresponding charge/discharge profiles of the NCM|ELGS-1|Li cell
